# Supplementary material
Source: publisher figshare collection journal article supplement (https://gsajournals.figshare.com/ndownloader/files/28102716)
Supplement: Supplementary file 1 [file 28102716]

**Figure S1.** Correlation matrix for untransformed, across-location BLUPs of 15 elemental phenotypes from fresh kernels in the sweet corn association panel. Pearson’s correlation coefficients (*r*) are presented in the upper triangle, while the corresponding *P*-values for the significance of associations (α = 0.05) are displayed below the diagonal.
